# Supplementary material for: Special tailoring of a copper–pyromellitic acid complex with sulfonated poly(ether ether ketone) to form a composite membrane for polymer electrolyte fuel cells
Source: Royal Society of Chemistry journal article supplement (doi:10.1039/d3nj02504g), 2023-01-01
Supplement: d3nj02504g1.pdf [file d3nj02504g1.pdf]

# Supporting Information

## Special tailoring of copper-pyromellitic acid complex with sulfonated poly(ether ether ketone) to form composite membrane for polymer electrolyte fuel cells

Anil Kumar U.,<sup>[a,b,#]</sup> R. Sakthivel,<sup>[a,b,#]</sup> Asis Sethi,<sup>[a,b]</sup> Baskaran Mohan Dass,<sup>[a]</sup> Santoshkumar D Bhat,<sup>\*[a,b]</sup> Vishal M. Dhavale,<sup>\*[a,b]</sup>

<sup>a</sup>CSIR-Central Electrochemical Research Institute-Madras Unit, CSIR Madras Complex, Taramani, Chennai 600113, India.

<sup>b</sup>Academy of Scientific and Innovative Research (AcSIR), Ghaziabad- 201 002, India.

<sup>#</sup>Contributed equally to this work.

---

### Table of contents:

| Figure No  | Content                                                                                                                                                                                                                                                | Page No |
|------------|--------------------------------------------------------------------------------------------------------------------------------------------------------------------------------------------------------------------------------------------------------|---------|
| Figure S1  | EDAX analysis of sPEEK and different wt. % composite membranes                                                                                                                                                                                         | 3       |
| Figure S2  | AFM analysis of sPEEK and different wt. % composite membranes                                                                                                                                                                                          | 4       |
| Figure S3  | Chemical stability of sPEEK and sPEEK/Cu-PMA-0.5 wt.% composite membrane and optical images before and after the chemical degradation test                                                                                                             | 5       |
| Figure S4  | Comparative XRD patterns of copper acetate, pyromellitic acid (PMA), as-prepared Cu-PMA                                                                                                                                                                | 5       |
| Figure S5  | Comparative FT-IR spectra of pyromellitic acid and as prepared Cu-PMA, sPEEK, sPEEK/Cu-PMA 0.5 wt.% composite membrane and FE-SEM image of Cu-PMA, and proposed structure for Cu-PMA                                                                   | 6       |
| Figure S6  | <sup>1</sup> H-NMR spectra of sPEEK and sPEEK/Cu-PMA-0.5 wt.% composite membrane.                                                                                                                                                                      | 7       |
| Figure S7  | XPS Spectra of Cu 2P, C1s, O1s and survey spectra of Cu-PMA                                                                                                                                                                                            | 8       |
| Figure S8  | Comparative water uptake % results at room temperature and 60 °C for sPEEK and composite membranes of different wt. %                                                                                                                                  | 8       |
| Figure S9  | Comparative water uptake, IEC, hydration number results for sPEEK and different wt. % composite membranes                                                                                                                                              | 9       |
| Figure S10 | EIS plots for sPEEK and different wt. % composite membranes recorded at different temperature (30 – 90 °C) at 98% RH condition                                                                                                                         | 9       |
| Figure S11 | EIS plots of sPEEK/Cu-PMA-0.5 wt.% composite membrane recorded for the stability assessment                                                                                                                                                            | 10      |
| Figure S12 | Durability test result of OCV measurement as function of time for sPEEK/Cu-PMA-0.5 wt.% composite membrane-based MEA for 125 hours and illustration of Voltage decay rate for sPEEK, Nafion 212 and sPEEK/Cu-PMA-0.5 wt.% composite membrane-based MEA | 10      |

|            |                                                                                                                                                                                                                                                  |    |
|------------|--------------------------------------------------------------------------------------------------------------------------------------------------------------------------------------------------------------------------------------------------|----|
| Figure S13 | Polarisation curves recorded during OCV degradation test for Nafion, sPEEK and sPEEK/Cu-PMA-0.5 wt.% based MEA's after regular intervals                                                                                                         | 11 |
| Figure S14 | Solid-state cyclic voltammogram and hydrogen crossover study for Nafion 212, sPEEK, sPEEK/Cu-PMA composite membranes in regular time intervals                                                                                                   | 11 |
| Figure S15 | UV-vis spectra of sPEEK/Cu-PMA-0.5 wt.% after 100 hrs of fuel cell operation                                                                                                                                                                     | 12 |
| Figure S16 | Constant current discharge rate test result as function of time for MEA's of sPEEK, sPEEK/Cu-PMA-0.5 wt.% composite membrane and Nafion 212, and Voltage decay rate for sPEEK, Nafion 212 and sPEEK/Cu-PMA-0.5 wt.% composite membrane-based MEA | 12 |
| Figure S17 | Polarisation curves recorded during constant current discharge test for Nafion, sPEEK and sPEEK/Cu-PMA-0.5 wt.% based MEA's                                                                                                                      | 13 |
| Figure S18 | Comparative p-XRD diffraction pattern of Cu-PMA before and after stability test                                                                                                                                                                  | 13 |
| Figure S19 | Snapshot of sPEEK/Cu-PMA-0.5 wt.% composite membrane-based MEA                                                                                                                                                                                   | 14 |
| Table S1   | Comparative list of the properties and fuel cell performance of the as-prepared sPEEK/Cu-PMA composite membrane with the literature reports                                                                                                      | 15 |
|            | References                                                                                                                                                                                                                                       | 16 |

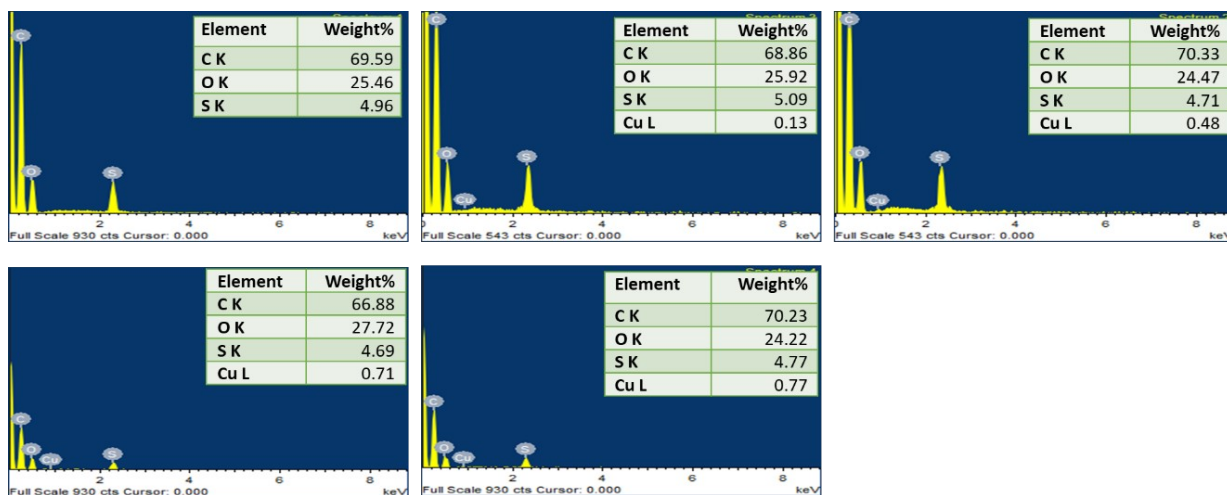

**Figure S1:** EDAX analysis of (a) sPEEK, (b) sPEEK/Cu-PMA-0.25 wt.%, (c) sPEEK/Cu-PMA-0.5 wt.%, (d) sPEEK/Cu-PMA-0.75 wt.%, and (e) sPEEK/Cu-PMA-1 wt.%.

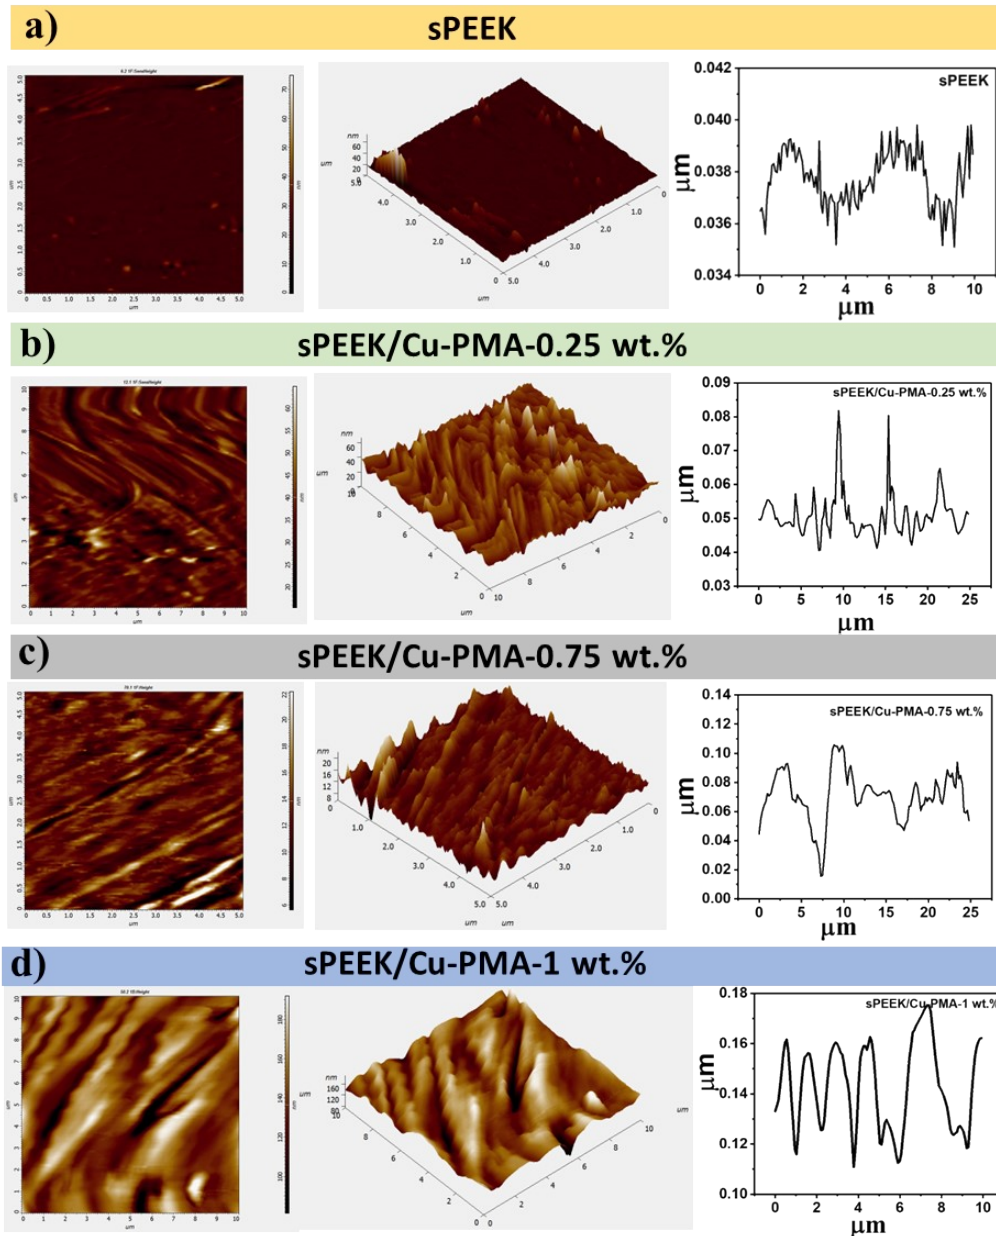

**Figure S2.** AFM analysis of (a) sPEEK, (b) sPEEK/Cu-PMA-0.25 wt.%, (c) sPEEK/Cu-PMA-0.5 wt.%, (d) sPEEK/Cu-PMA-0.75 wt.%, and (e) sPEEK/Cu-PMA-1 wt.%

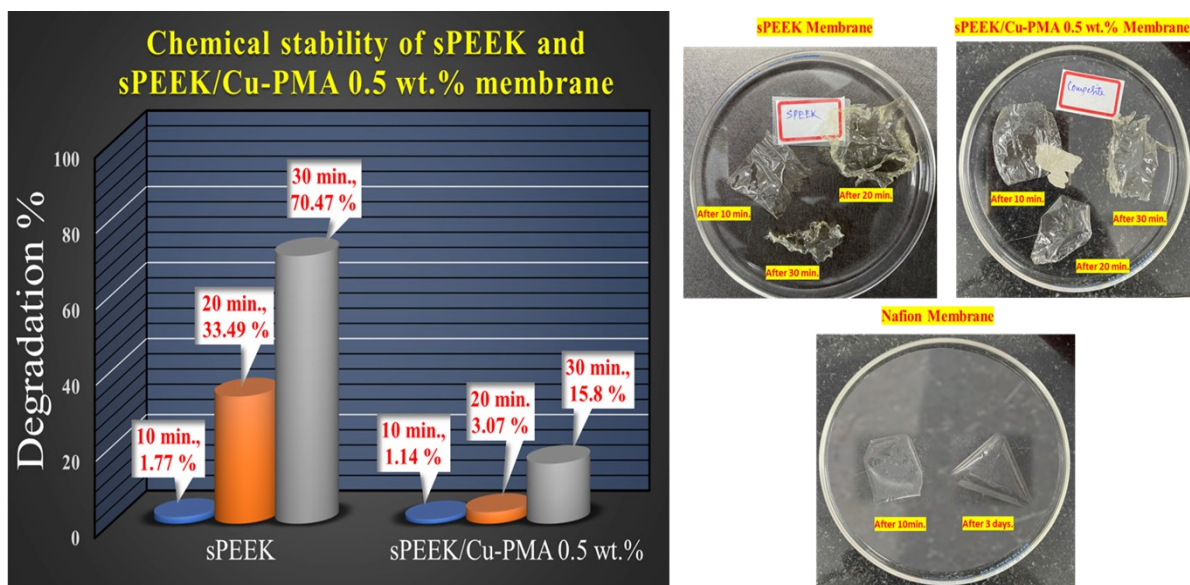

**Figure S3:** a) Chemical stability of sPEEK and sPEEK/Cu-PMA-0.5 wt.% composite membrane and b) Optical images of sPEEK, Nafion 212 and sPEEK/Cu-PMA-0.5 wt.% composite membrane at regular time intervals.

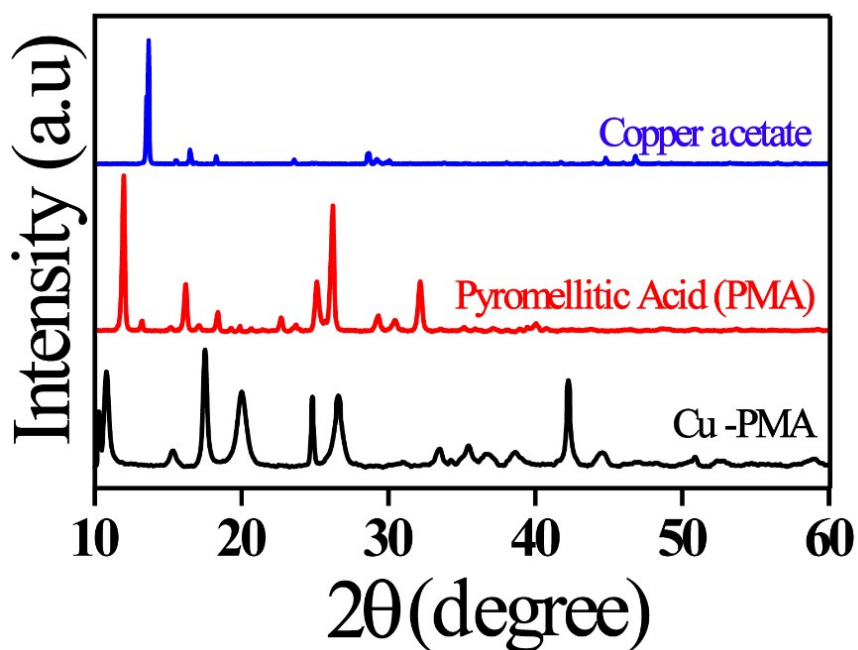

**Figure S4.** Comparative XRD patterns of the as-prepared sPEEK, sPEEK/Cu-PMA-0.25 wt.%, sPEEK/Cu-PMA-0.5 wt.%, sPEEK/Cu-PMA-0.75 wt.%, and sPEEK/Cu-PMA-1 wt.% composite membranes.

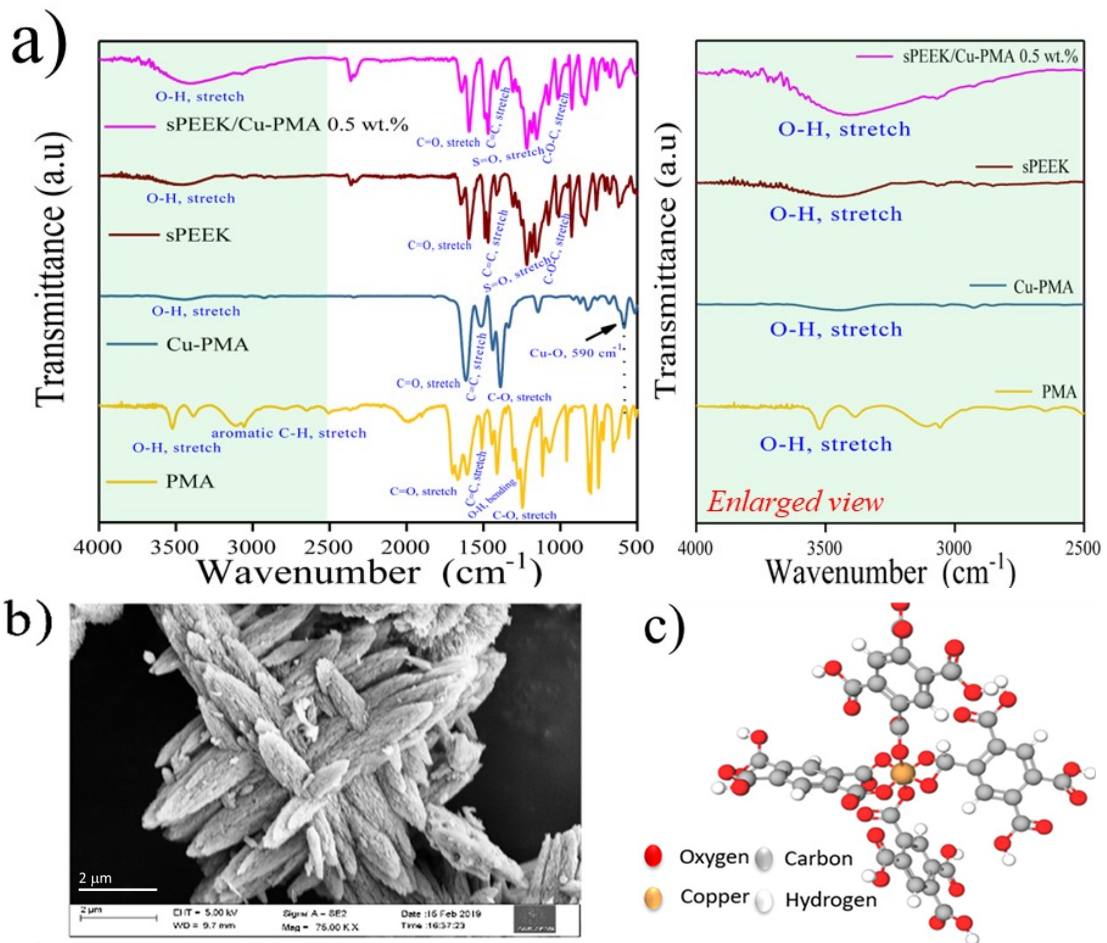

**Figure S5.** a) Comparative FT-IR spectra of pyromellitic acid, Cu-PMA, sPEEK and sPEEK/Cu-PMA-0.5 wt.% membrane, enlarged view is green shaded region of fig. a, b) SEM image of Cu-PMA, and c) Proposed structure for Cu-PMA complex.

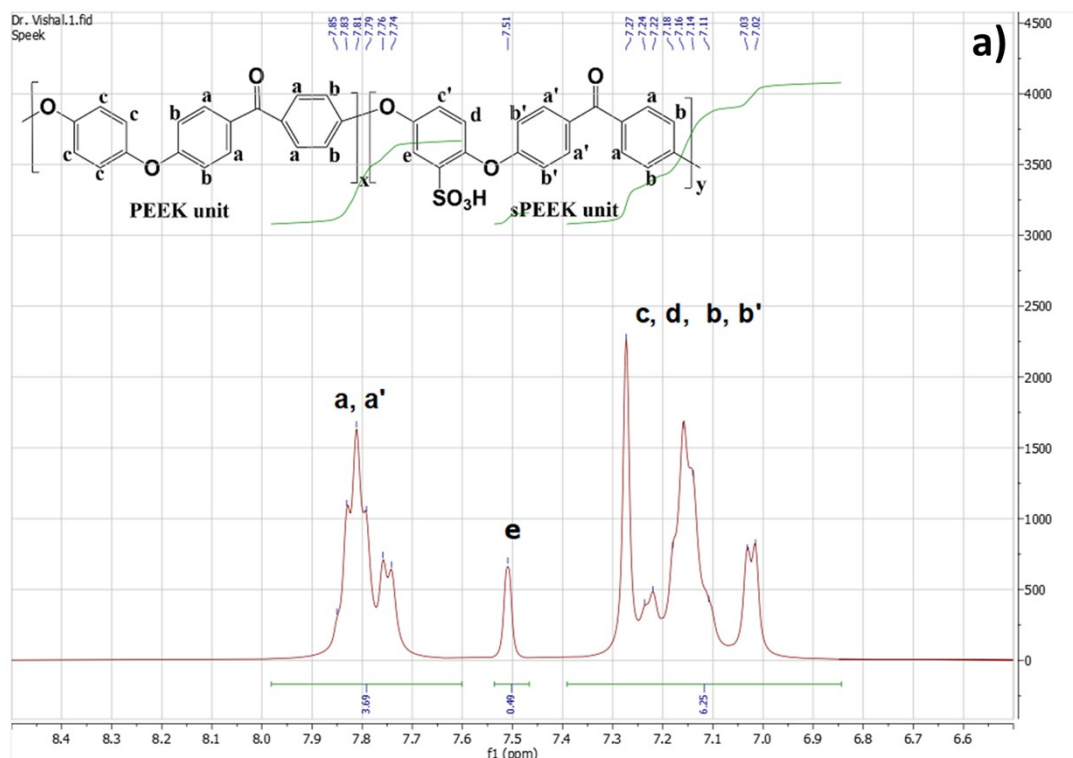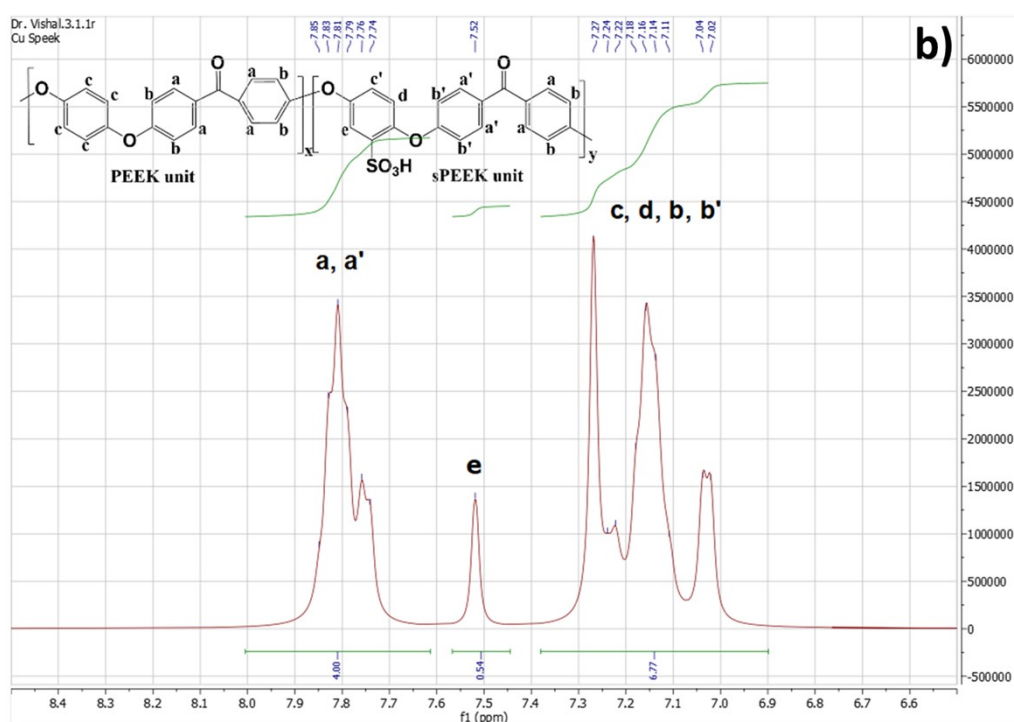

**Figure S6.** *a, b*) <sup>1</sup>H-NMR spectra of sPEEK (top), and sPEEK/Cu-PMA-0.5 wt.% composite membrane (bottom), respectively.

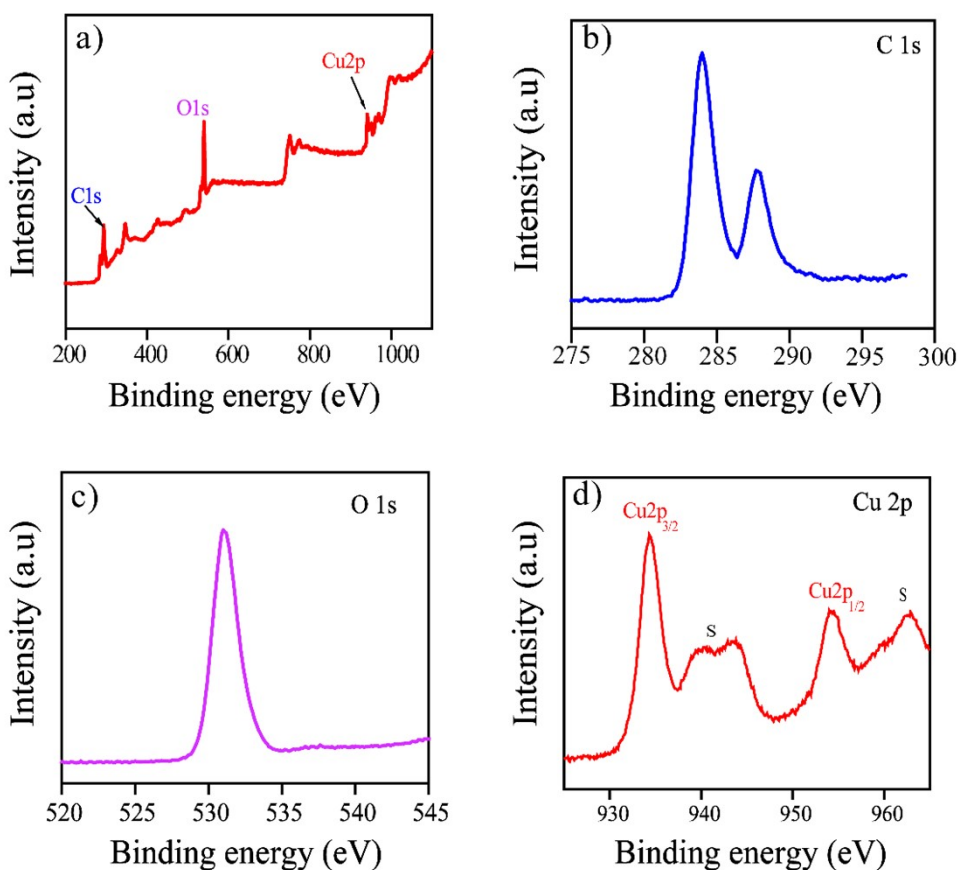

**Figure S7:** a) Survey spectrum of Cu-PMA, high resolution XPS of b) Cls, c) O1s, and d) Cu2p.

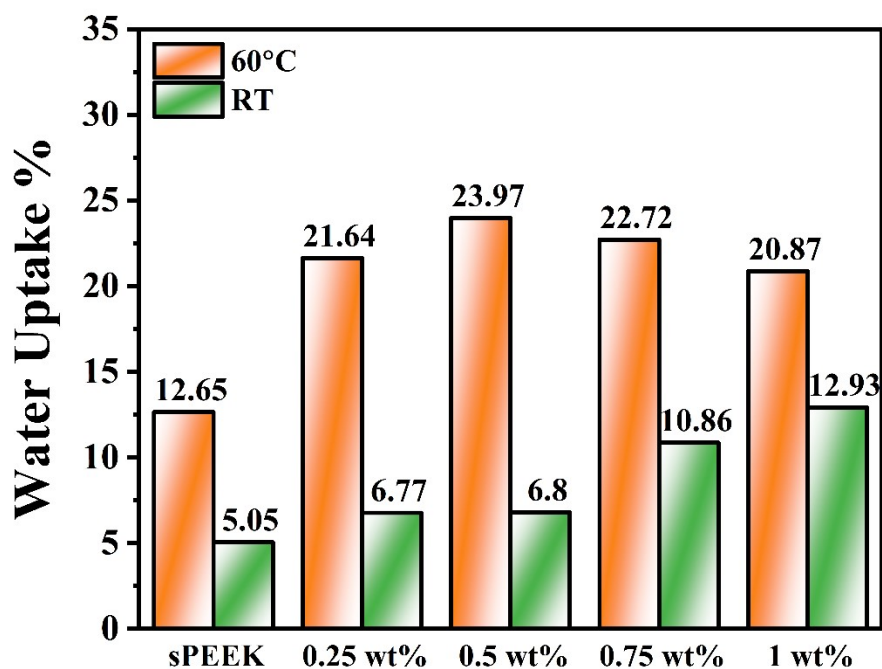

**Figure S8.** Comparative water uptake results for the as-prepared sPEEK, sPEEK/Cu-PMA-0.25 wt.%, sPEEK/Cu-PMA-0.5 wt.%, sPEEK/Cu-PMA-0.75 wt.%, and sPEEK/Cu-PMA-1 wt.% composite membranes at room temperature (RT) and 60 °C temperature.



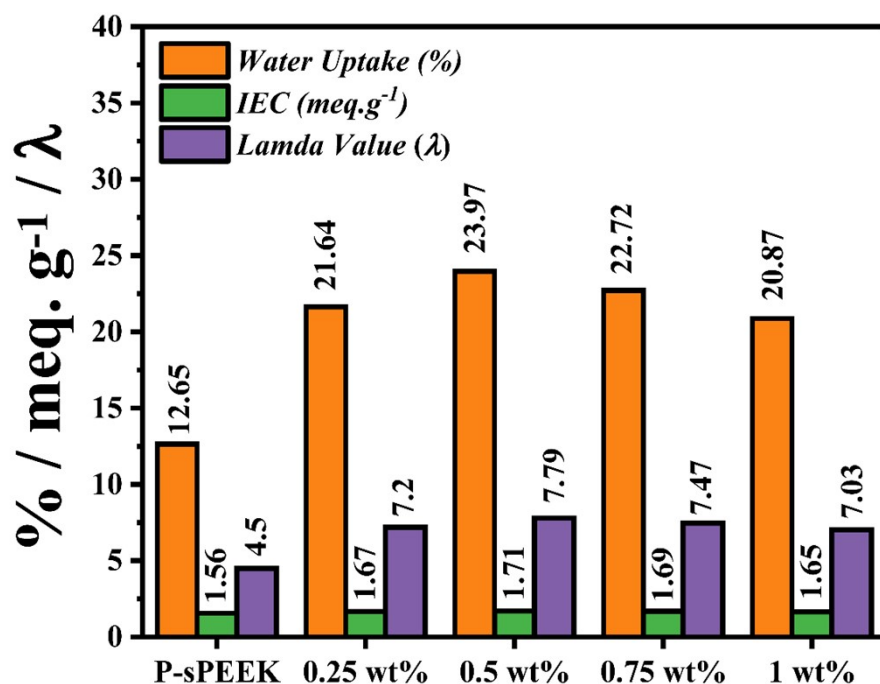

**Figure S9.** Water uptake, IEC, and Lambda value for the as-prepared sPEEK, sPEEK/Cu-PMA-0.25 wt.%, sPEEK/Cu-PMA-0.5 wt.%, sPEEK/Cu-PMA-0.75 wt.%, and sPEEK/Cu-PMA-1 wt.% composite membranes.

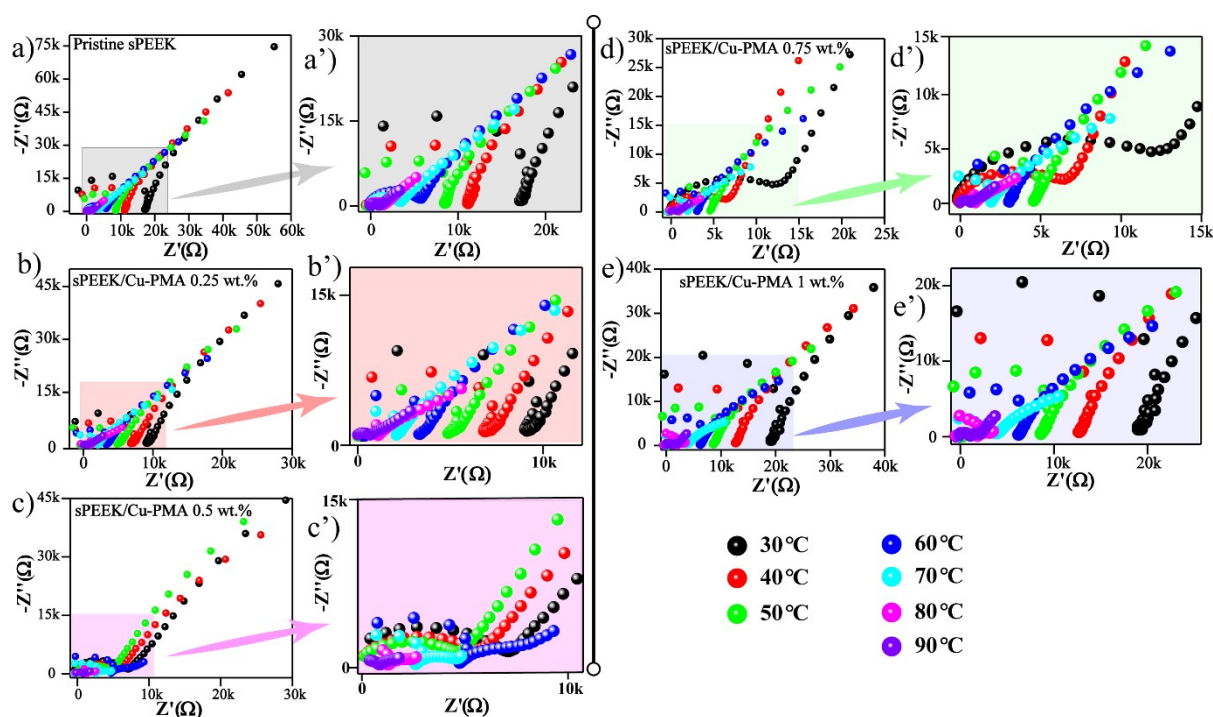

**Figure S10.** (a-e) EIS plots of as-prepared sPEEK, sPEEK/Cu-PMA-0.25 wt.%, sPEEK/Cu-PMA-0.5 wt.%, sPEEK/Cu-PMA-0.75 wt.%, and sPEEK/Cu-PMA-1 wt.% composite membranes recorded at different temperatures of 30 – 90 °C, and at 98% RH. (a'–e') are corresponding magnified plots marked with different colours.

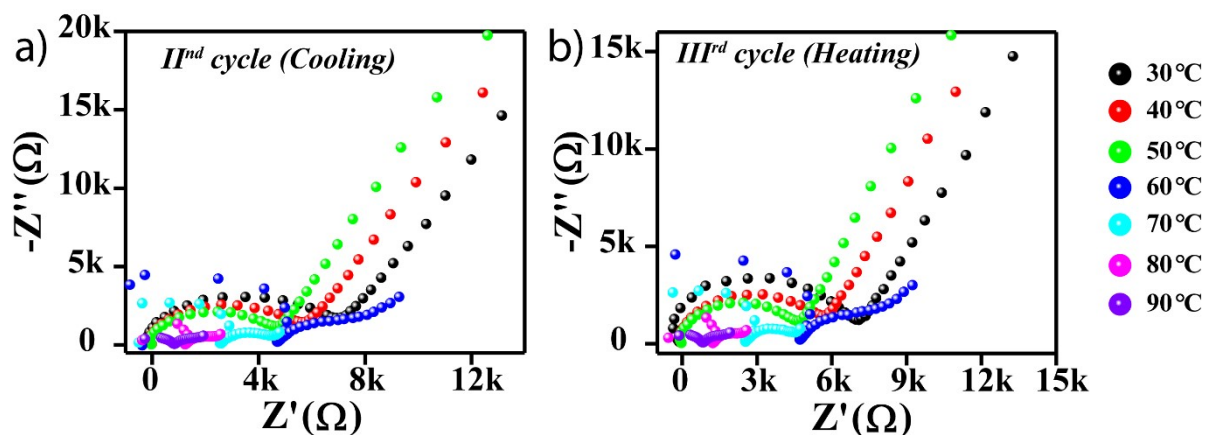

**Figure S11.** EIS plots of sPEEK/Cu-PMA-0.5 wt.% composite membrane recorded for the stability assessment. EIS plot for the I<sup>st</sup> cycle (Heating) is shown in Figure S10c, and subsequent II<sup>nd</sup> and III<sup>rd</sup> cycles of the cooling and heating is shown here a and b, respectively.

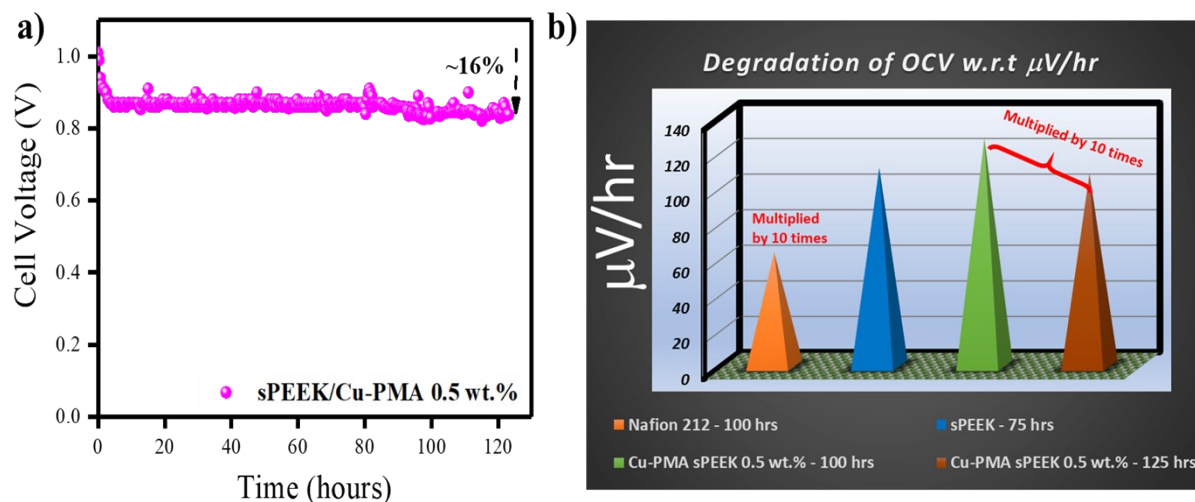

**Figure S12:** a) Durability test result of OCV measurement as function of time for sPEEK/Cu-PMA 0.5 wt.% composite membrane-based MEA for 125 hrs. Conditions: Anode and Cathode side -commercial Pt/C electrodes, Pt-loading- 0.5 mg-Pt/cm<sup>2</sup> at anode and cathode side, respectively; Active area: 7.0 cm<sup>2</sup>, Cell temperature- 80 °C, Relative humidity: 30 % RH at both side, Gases – Pure hydrogen (100 mL/min) and air (150 mL/min) as a fuel and oxidant at anode and cathode side, respectively. b) Measured degradation rate for Nafion 212, sPEEK, sPEEK/Cu-PMA 0.5 wt.%, sPEEK/Cu-PMA 0.5 wt.% based MEA's after the durability test. Please Note: In Figure b, Y-axis values of Nafion 212 and Cu-PMA/sPEEK-0.5 wt.% 100 hrs and 125 hrs are of 10x, to show the differences and variations with respect to each other.

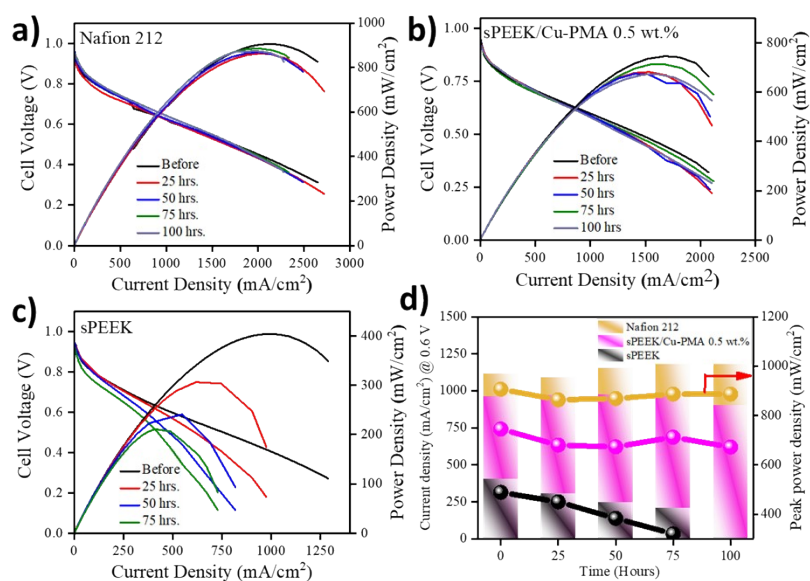

**Figure S13:** Polarisation curves recorded during OCV degradation test. Polarisation curves for a) Nafion 212-based MEA after 0, 25, 50, 75, and 100 hrs of test, b) sPEEK/Cu-PMA-0.5 wt.%-based MEA after 0, 25, 50, 75, and 100 hrs test, c) sPEEK-based MEA after 0, 25, 50, and 75 hrs test. d) Comparison of current density @ 0.6 V and peak power densities of sPEEK, sPEEK/Cu-PMA-0.5 wt.% and Nafion 212 based MEA's after 0, 25, 50, 75, and 100 hrs test. Conditions: Anode and Cathode side-commercial Pt/C electrodes, Pt-loading- 0.5 mg-Pt/cm<sup>2</sup> at anode and cathode side, respectively, Active area: 7.0 cm<sup>2</sup>, Cell temperature- 60 °C, Relative humidity: 90 % RH at both side, Gases – Pure hydrogen (1.2 Stio.) and oxygen (3.5 Stio.) as a fuel and oxidant at anode and cathode side, respectively.

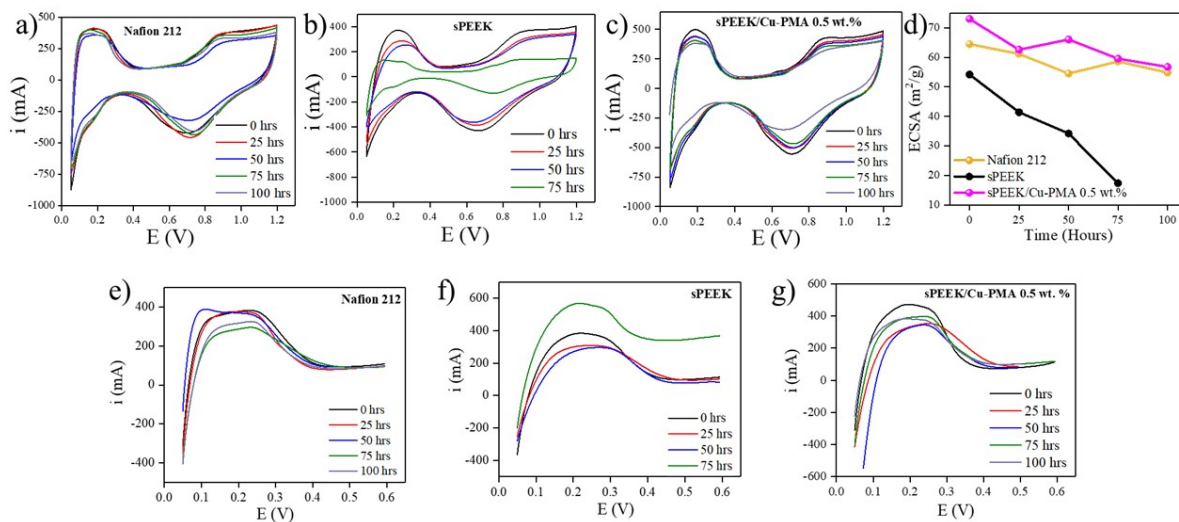

**Figure S14:** a-c) Solid-state cyclic voltammogram for Nafion 212, sPEEK, sPEEK/Cu-PMA-0.5 wt.% based MEAs respectively, after regular time intervals during OCV degradation test. d) Change in electrochemical active surface area w.r.t time. e-g) H<sub>2</sub> cross-over study for Nafion 212, sPEEK, sPEEK/Cu-PMA-0.5 wt.% based MEAs respectively. Both the measurements were done at scan rate of 50 mV/s. Conditions: Anode and Cathode commercial Pt/C electrodes, Pt-loading- 0.5 mg-Pt/cm<sup>2</sup> at both sides, Active area: 7.0 cm<sup>2</sup>, Cell temperature- 60 °C, Relative humidity: 90 % RH at both sides, Gases – Pure hydrogen (100 mL/min), on Anode, and nitrogen (300 mL/min) on cathode side.

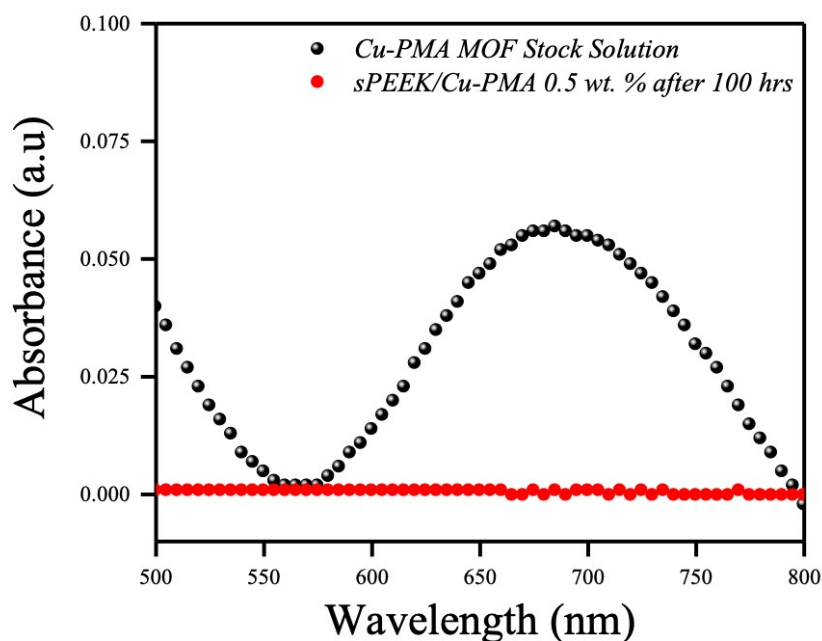

**Figure S15:** Comparative UV-vis spectra of product water collected during OCV stability test of sPEEK/Cu-PMA-0.5 wt.% - based MEA after 100 h, and compared with the standard stock solution of Cu-PMA.

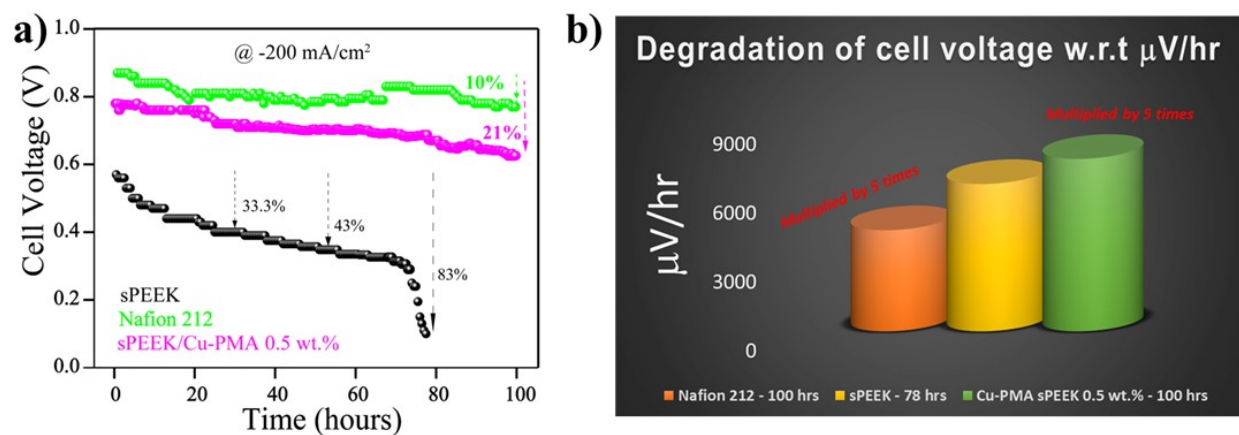

**Figure S16:** a) Constant current discharge test as function of time for MEA's of sPEEK, sPEEK/Cu-PMA-0.5 wt.% composite membrane, and Nafion 212 at constant discharge rate of 0.2 A/cm<sup>2</sup>. Conditions: Anode and Cathode side -commercial Pt/C electrodes, Pt-loading- 0.5 mg<sub>P</sub>/cm<sup>2</sup> at anode and cathode side, respectively, Active area: 7.0 cm<sup>2</sup>, Cell temperature- 60 °C, Relative humidity: 50 % RH at both side, Gases – Pure hydrogen (100 mL/min) and oxygen (150 mL/min) as a fuel and oxidant at anode and cathode side, respectively. b) Measured degradation rate for Nafion 212, sPEEK, sPEEK/Cu-PMA 0.5 wt.% based MEA's. Please Note: In Figure S17b, Y-axis values of Nafion 212, and Cu-PMA/sPEEK-0.5 wt.% are of 5x, to show the differences and variations with respect to each other.

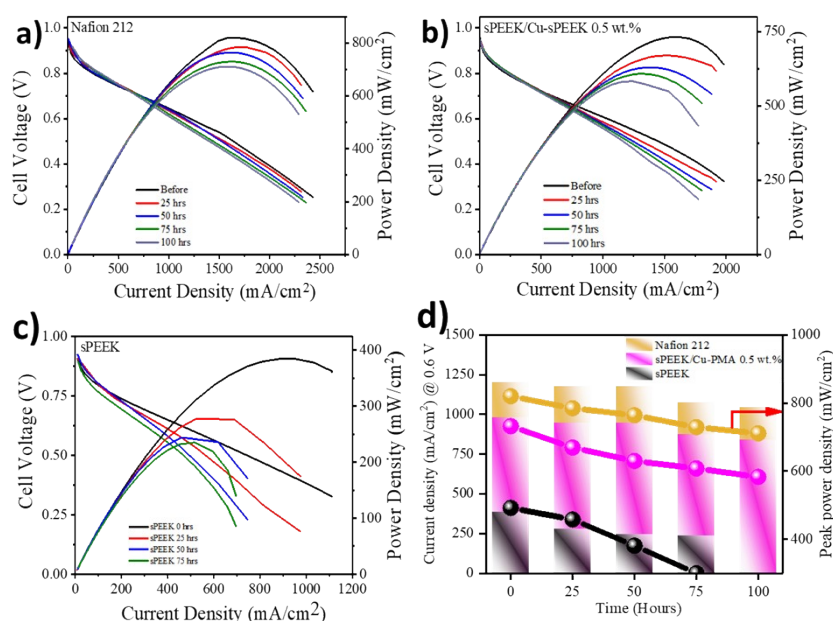

**Figure S17:** Polarisation curves for the MEAs during the constant current discharge rate test (discharge current is  $0.2 \text{ A/cm}^2$ ) as function of time.

Polarisation curves for a) Nafion 212-based MEA's after 0, 25, 50, 75 and 100 h of test, b) sPEEK/Cu-PMA-0.5 wt.%-based MEA after 0, 25, 50, 75 and 100 h of test, c) sPEEK-based MEA after 0, 25, 50, and 75 hrs of test. d) Observed current density @ cell voltage of 0.6 V and peak power densities from the polarisation curves presented in (a-c) for the Nafion 212, sPEEK/Cu-PMA 0.5 wt.% and sPEEK based MEA's. Conditions: Anode and Cathode side -commercial Pt/C electrodes, Pt-loading-  $0.5 \text{ mg-Pt/cm}^2$  at anode and cathode side, respectively, Active area:  $7.0 \text{ cm}^2$ , Cell temperature-  $60 \text{ }^\circ\text{C}$ , Relative humidity: 90 % RH at both side, Gases – Pure hydrogen (1.2 Stio.) and oxygen (3.5 Stio.) as a fuel and oxidant at anode and cathode side, respectively

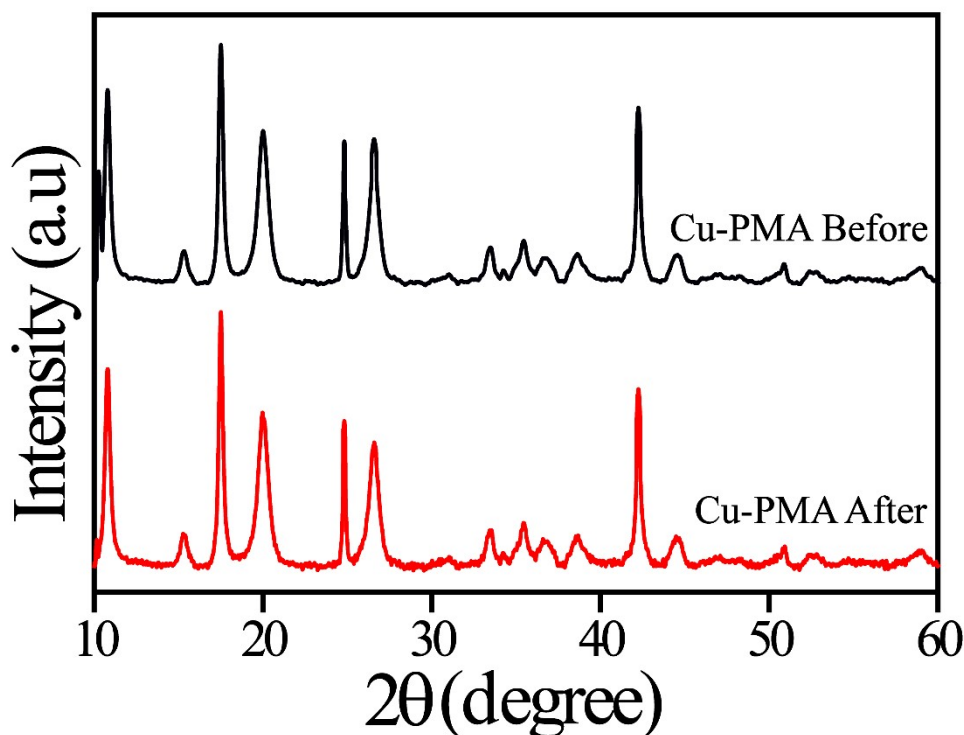

**Figure S18.** Comparative p-XRD diffraction pattern of Cu-PMA before and after stability test.

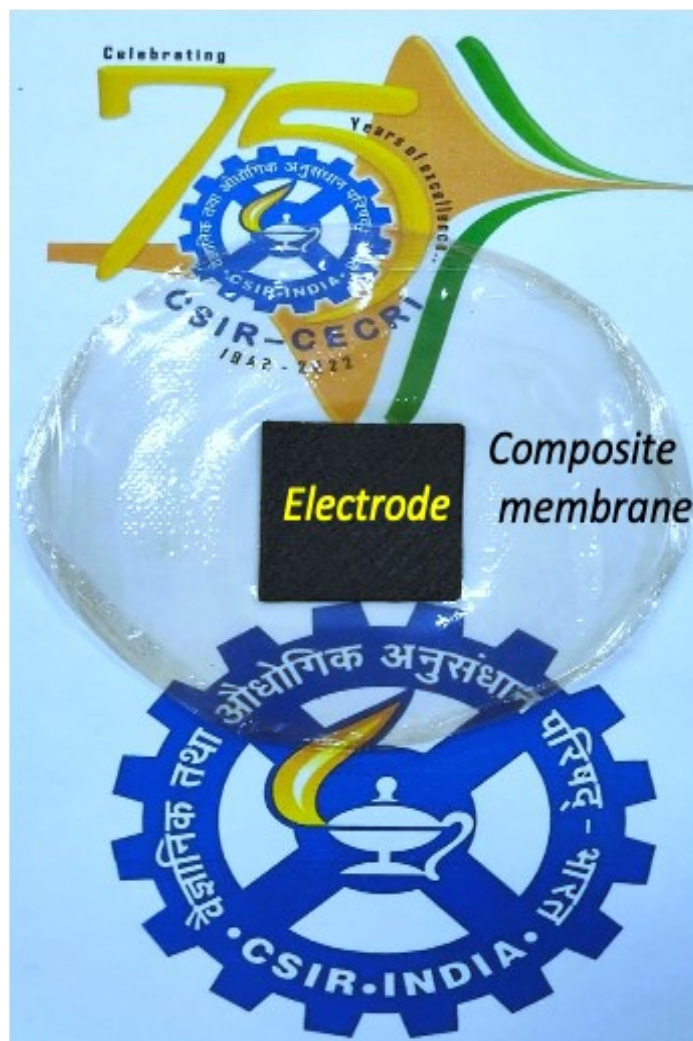

**Figure S19:** Snapshot of *s*PEEK/Cu-PMA-0.5 wt.% composite membrane-based MEA.

**Table S1:** Comparative list of the properties and fuel cell performance of the as-prepared sPEEK/Cu-PMA composite membrane with the literature reports

| S. No | Membrane                                        | Filler loading (%) | Conductivity (mS/cm) | Conductivity @ conditions |      | Pt-catalyst loading (mg/cm <sup>2</sup> ) | Fuel cell performance                         |                                             | Fuel cell performance @ condition |      | Ref.      |
|-------|-------------------------------------------------|--------------------|----------------------|---------------------------|------|-------------------------------------------|-----------------------------------------------|---------------------------------------------|-----------------------------------|------|-----------|
|       |                                                 |                    |                      | Temp. (°C)                | RH%. |                                           | Current density (mA/cm <sup>2</sup> ) @ 0.6 V | Maximum power density (mW/cm <sup>2</sup> ) | Temp. (°C)                        | RH%. |           |
|       |                                                 |                    |                      |                           |      |                                           |                                               |                                             |                                   |      |           |
| 2.    | sPEEK/Cu-PMA-0.25 wt.%                          | 0.25               | 124.6                | 90                        | 98   | 0.5                                       | 660.3                                         | 476.17                                      | 60                                | 90   | This work |
| 3.    | sPEEK/Cu-PMA-0.5 wt.%                           | 0.50               | 161.4                | 90                        | 98   | 0.5                                       | 960.14                                        | 748                                         | 60                                | 90   | This work |
| 4.    | sPEEK/Cu-PMA-0.75 wt.%                          | 0.75               | 137.8                | 90                        | 98   | 0.5                                       | 564.5                                         | 427.61                                      | 60                                | 90   | This work |
| 5.    | sPEEK/Cu-PMA-1wt.%                              | 1                  | 131.9                | 90                        | 98   | 0.5                                       | 564.6                                         | 446.02                                      | 60                                | 90   | This work |
| 6.    | Nafion 212                                      | --                 | 101.20               | 90                        | 98   | 0.5                                       | 1203                                          | 906.56                                      | 60                                | 90   | This work |
| 7.    | 10CE/sPEEK                                      | 10                 | 242                  | 80                        | 100  | 0.3                                       | 790                                           | 474                                         | 80                                | 100  | [1]       |
| 8.    | sPEEK/TPa-SO <sub>3</sub> H-20                  | 20                 | 443.6                | 60                        | 95   | --                                        | --                                            | --                                          | --                                | --   | [2]       |
| 9.    | SP-BCZO-7.5                                     | 7.5                | 30                   | 90                        | --   | 0.5                                       | --                                            | 574                                         | 60                                | 100  | [3]       |
| 10.   | sPEEK/ZMix                                      | 1                  | 29                   | 100                       | --   | --                                        | --                                            | --                                          | --                                | --   | [4]       |
| 11.   | PA-C-sPEEK-Im-20                                | 20                 | 39                   | 130                       | 30   | 0.7                                       | 600 <sup>s</sup>                              | 209                                         | 130                               | 30   | [5]       |
| 12.   | sPEEK/sGNR (0.1wt. %)                           | 0.1                | 63.45                | 60                        | 100  | 0.5                                       | 840                                           | 660                                         | 60                                | 100  | [6]       |
| 13.   | Nafion 212                                      | --                 | 76.34                | 60                        | 100  | 0.5                                       | 1132                                          | 900                                         | 60                                | 100  | [6]       |
| 14.   | sPEEK/n-BuOH                                    | --                 | 314                  | 80                        | 90   | --                                        | --                                            | --                                          | --                                | --   | [7]       |
| 15.   | sPEEK/PCAS-15                                   | 15                 | 38                   | 80                        | 100  | --                                        | --                                            | --                                          | --                                | --   | [8]       |
| 16.   | sPEEK/SSLM 5%                                   | 5                  | 184                  | 90                        | 95   | --                                        | --                                            | --                                          | --                                | --   | [9]       |
| 17.   | sPEEK/2-AGO                                     | 2                  | 11.32                | 120                       | 20   | --                                        | --                                            | --                                          | --                                | --   | [10]      |
| 18.   | sPEEK/DGO-5                                     | 5                  | 3                    | 120                       | 20   | 0.25                                      | 698.6 <sup>s</sup>                            | 162.1                                       | 120                               | #    | [11]      |
| 19.   | sPEEK/TPA                                       | --                 | 95                   | 100                       | 90   | --                                        | --                                            | --                                          | --                                | --   | [12]      |
| 20.   | sPEEK/WO <sub>3</sub>                           | 50                 | 19                   | 100                       | 100  | --                                        | --                                            | --                                          | --                                | --   | [13]      |
| 21.   | sPEEK/sCNT                                      | 5                  | 124                  | 90                        | 100  | --                                        | --                                            | --                                          | --                                | --   | [14]      |
| 22.   | sPEEK/PVA@GO-NF10                               | 10                 | 70                   | 90                        | 100  | --                                        | --                                            | --                                          | --                                | --   | [15]      |
| 23.   | sPEEK/PSSA-CNT                                  |                    | 87                   | 80                        | 95   | --                                        | --                                            | --                                          | --                                | --   | [16]      |
| 24.   | sPPEK/SGNF                                      | 0.5                | 104                  | 80                        | 95   | --                                        | --                                            | --                                          | --                                | --   | [17]      |
| 25.   | sPEEK/PIL/PA                                    | --                 | 45                   | 160                       | --   | --                                        | --                                            | --                                          | --                                | --   | [18]      |
| 26.   | sPEEK/SGO                                       | 5                  | 55                   | 80                        | 30   | --                                        | --                                            | --                                          | --                                | --   | [19]      |
| 27.   | sPEEK/FPAPB/Fe <sub>3</sub> O <sub>4</sub> -FGO | 5                  | 11.13                | 120                       | 20   | --                                        | --                                            | --                                          | --                                | --   | [20]      |
| 28.   | sPEEK/CeO <sub>2</sub> -ATiO <sub>2</sub>       | 2                  | 17.06                | 60                        | 20   | 0.3                                       | 371                                           | 117                                         | 60                                | 100  | [21]      |
| 29.   | sPEEK/QNPAES-6 wt.%                             | 6                  | 30.4                 | 90                        | 20   | 0.3                                       | 1180                                          | 560                                         | 60                                | 100  | [22]      |

<sup>s</sup> Maximum current density at Maximum Power Density, #Anhydrous conditions,

## **References:**

- [1] A. Sahin, H. M. Tasdemir and İ. Ar, *Ionics*, 2019, **25**, 5163–5175.
- [2] X. Meng, Y. Lv, L. Ding, L. Peng, Q. Peng, C. Cong, H. Ye and Q. Zhou, *Nanomaterials*, 2022, **12**, 3518.
- [3] G. Sivasubramanian, S. A. G. Thangavelu, B. M. Mahimai, K. Hariharasubramanian and P. Deivanayagam, *J Mater Sci: Mater Electron*, 2021, **33**, 8626–8634.
- [4] A. Barjola, J. Escorihuela, A. Andrio, E. Giménez and V. Compañ, *Nanomaterials*, 2018, **8**, 1042.
- [5] J. Jiang, X. Zhu, H. Qian, J. Xu, Z. Yue, Z. Zou and H. Yang, *Sustain. Energy Fuels*, 2019, **3**, 2426–2434.
- [6] A. Shukla, S. D. Bhat and V. K. Pillai, *J. Memb. Sci.*, 2016, **520**, 657–670.
- [7] R. Wang, X. Wu, X. Yan, G. He and Z. Hu, *J. Memb. Sci.*, 2015, **479**, 46–54.
- [8] J. Wang, S. Jiang, H. Zhang, W. Lv, X. Yang and Z. Jiang, *J. Memb. Sci.*, 2010, **364**, 253–262.
- [9] C. Simari, A. Enotiadis and I. Nicotera, *Membranes*, 2020, **10**, 87.
- [10] S. Qu, C. Zhang, M. Li, Y. Zhang, L. Chen, Y. Yang, B. Kang, Y. Wang, J. Duan and W. Wang, *Korean J. Chem. Eng.*, 2019, **36**, 2125–2132.
- [11] Y. He, J. Wang, H. Zhang, T. Zhang, B. Zhang, S. Cao and J. Liu, *J. Mater. Chem. A*, 2014, **2**, 9548.
- [12] S. M. J. Zaidi, S. D. Mikhailenko, G. P. Robertson, M. D. Guiver and S. Kaliaguine, *J. Memb. Sci.*, 2000, **173**, 17–34.
- [13] B. Mecheri, A. D’Epifanio, M. L. Di Vona, E. Traversa, S. Licoccia and M. Miyayama, *J. Electrochem. Soc.*, 2006, **153**, A463.
- [14] S. Gahlot and V. Kulshrestha, *ACS Appl. Mater. Interfaces*, 2015, **7**, 264–272.
- [15] J. L. Reyes-Rodriguez, J. Escorihuela, A. García-Bernabé, E. Giménez, O. Solorza-Feria and V. Compañ, *RSC Adv.*, 2017, **7**, 53481–53491.
- [16] G. Rambabu and S. D. Bhat, Carbon-Polymer Nanocomposite Membranes as Electrolytes for Direct Methanol Fuel Cells. In *Membrane Technology*, S. Sridhar, ed. Taylor and Francis (CrC press), Boca Raton, FL, USA, 2014, pp. 299–316.
- [17] G. Rambabu, S. Sasikala and S. D. Bhat, *RSC Adv.*, 2016, **6**, 107507–107518.
- [18] Q. Che and J. Yue, *RSC Adv.*, 2016, **6**, 111729–111738.
- [19] R. Kumar, M. Mamlouk and K. Scott, *RSC Adv.*, 2014, **4**, 617–623.
- [20] M. Vinothkannan, A. R. Kim, G. G. Kumar, J. M. Yoon and D. J. Yoo, *RSC Adv.*, 2017, **7**, 39034.



- [21] H. Ranganathan, M. Vinothkannan, A. R. Kim, V. Subramanian, M. S. Oh and D. J. Yoo, *Int J Energy Res.*, 2022, **46**, 9041-9057.
- [22] A. R. Kim, M. B. Poudel, J. Y. Chu, M. Vinothkannan, R. S. Kumar, N. Logeshwaran, G. H. Park, M. K. Han and D. J. Yoo, *Compos B: Eng.*, 2023, **254**, 110558.
